# Supplementary material for: Molecular-scale investigation of Cu( ii ) interactions with synthetic and natural zeolites during removal and recovery
Source: Royal Society of Chemistry journal article supplement (doi:10.1039/d5ew00972c), 2025-12-16
Supplement: d5ew00972c1.pdf [file d5ew00972c1.pdf]

Supplementary Information for

Molecular-scale investigation of Cu(II) interactions with  
synthetic and natural zeolites during removal and recovery

*Case M. van Genuchten<sup>1\*</sup>, Kaifeng Wang<sup>1</sup>, Claus Kjøller<sup>1</sup>, Knud Dideriksen<sup>1</sup>*

<sup>1</sup>Department of Geochemistry, Geological Survey of Denmark and Greenland (GEUS), Øster  
Voldgade 10, Copenhagen, Denmark

Corresponding Author: [cvvg@geus.dk](mailto:cvvg@geus.dk)

Pages: 22

Figures: 10

Tables: 4

## 19 S1. PHREEQC model and fitting of isotherm data

20         The PHREEQC model was intended to allow simulations at both lower and higher  
21 salinity. Consequently, we based the model on the Pitzer approach for calculation of activity  
22 coefficients, using the geodat\_1-4 database by Moog and Cannepin (2014) as a starting point.  
23 This database has been developed for use in geothermal systems. However, it does not have  
24 Pitzer parameters for Cu. As the first step of the modelling, we therefore tested the performance  
25 of several Pitzer parameter datasets for the Cu-Na-Cl-H<sub>2</sub>O system in combination with the  
26 geodat\_1-4 database (Downes and Pitzer, 1976; Kim and Frederick, 1988; Haung, 1989; Ma et  
27 al., 2019). The Haung, 1989 dataset performed the best, albeit with some mismatch compared  
28 to the speciation provided in the corresponding publication. To match the speciation, various  
29 alterations to the thermodynamic dataset were tested. After slight adjustments by omitting the  
30 CuCl<sup>+</sup>-Cl<sup>-</sup> interaction and changing the value for the stability of the CuCl<sub>4</sub><sup>2-</sup> complex, the  
31 simulations with the parameter set provided by Haung (1989), shown in Figure S2A, yielded  
32 reasonable agreement with the aqueous speciation given in the publication. In addition,  
33 simulated results agree with the solubility determined for atacamite (Le Roux et al., 2016;  
34 Figure S2B), the least soluble phase in our experimental conditions. Thus, this thermodynamic  
35 model allowed simulation with tolerable accuracy of published experimental and theoretical  
36 results. However, it is limited to 25 °C. The parameters of the thermodynamic model are given  
37 in Tables S1 and S2.

38         Using this thermodynamic model, we fitted model parameters to adsorption isotherms  
39 measured at room temperature. The datasets included in the fitting were Cu(II) adsorption to  
40 synthetic faujasite at pH 5 and 6 and to natural clinoptilolite at pH 5 (the pH 6 data was omitted  
41 to the predominance of Cu-Cu polymerization). In the fitting, we optimised the values for the  
42 stability constant for the exchange reaction as well as the cation exchange capacity (CEC). The  
43 exchange reactions are given by:

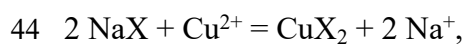

45 with a stability constant,  $K_{\text{Me}}$  given by:

46 
$$K_{\text{Me}} = \frac{(\text{NaX})^2 (\text{Cu}^{2+})}{(\text{Na}^+)^2 (\text{CuX}_2)}$$
 (Eq. S1)

47 Here, X represents an exchange site with a concentration dictated by the CEC; ( $\text{Na}^+$ )  
 48 and ( $\text{Cu}^{2+}$ ), the activity of aqueous  $\text{Na}^+$  and  $\text{Cu}^{2+}$ ; and ( $\text{NaX}$ ) and ( $\text{CuX}_2$ ), the activity of the  
 49 ions in the zeolite, which were calculated based on equivalent fractions (the Gaines-Thomas  
 50 convention).

51 To assess uncertainties in the fitting, we used two types of software, PHREEPLOT and  
 52 our own custom-made python routine (Vital et al., 2025), both of which were used to fit the  
 53 systems element wise. For the python-based fitting, we also fitted the adsorption data for both  
 54 elements simultaneously (i.e., with a single value for CEC for each zeolite). For all optimisation  
 55 of the equilibrium constants and CEC, we minimised the sum of the squared residuals between  
 56 the measured and calculated values for both the aqueous concentrations and the amount taken  
 57 up. Given that the fitting is based on absolute differences, it would provide a better fit of the  
 58 experimental data at higher Me concentrations, which we expect would be important when  
 59 CEC is also fitted.

60

61 S2. Synchrotron X-ray diffraction measurements of Cu(II)-loaded zeolites at the European  
 62 Synchrotron Radiation Facility.

63 Complementary XRD data for a subset of Cu(II)-loaded zeolite samples was obtained  
 64 to identify structural changes that had occurred in response to Cu(II) exposure. The data were  
 65 collected at Beamline ID31 of the European Synchrotron Radiation Facility (ESRF). For the  
 66 measurements, powdered samples were loaded into ~1 mm thick, cylindrical slots that were  
 67 mounted between Kapton windows in a sample holder. The measurement was conducted in

68 transmission geometry with an X-ray energy of 75.05 keV. The intensities of scattered X-rays  
69 were measured with a Pilatus CdTe 2M detector (1679 x 1475 pixels with pixel size of 172 x  
70 172  $\mu\text{m}^2$ ) positioned such that the incoming beam was located at the detector corner and that  
71 sample-to-detector distance was approximately 30 cm. The geometry of the setup was  
72 calibrated with LaB6 (NIST SRM 660b) and the software pyFAI.<sup>22</sup> Data are reported with the  
73 x-axis in Q-space.

74

### 75 S3. Shell-by-shell fitting procedure for endmember EXAFS spectra

76 Phase and amplitude functions for single- and multiple-scattering (MS) paths were  
77 calculated using FEFF6 (Rehr et al., 1992), and included Cu-O, Cu-Cu and Cu-O-O derived  
78 from the structure of spertiniite (Oswald et al., 1990) and Cu-Si/Al derived from the structure  
79 of diopase (Belokoneva et al., 2002). Theoretical curve fits were based on algorithms derived  
80 from IFEFFIT (Newville, 2001) and were performed from 1 to 4  $\text{\AA}$  in  $R+\Delta R$ -space. Parameters  
81 varied in the fits typically included the interatomic distance ( $R$ ), the coordination number (CN)  
82 and the change in threshold energy ( $\Delta E_0$ ). However, due to high fit-derived correlations  
83 between CN and  $\sigma^2$ , particularly for second-shell fits, we constrained  $\sigma^2$  for Cu-Cu (0.006-  
84 0.007  $\text{\AA}^2$ ) and Cu-Si/Al (0.012  $\text{\AA}^2$ ) atomic pairs to values reported for previous fits of CuO  
85 (Cheah et al., 2000) and Cu(II) sorbed to faujasite (Sushkevich et al., 2020), respectively. In  
86 addition, despite the expected distortion of first-shell oxygen atoms for Cu(II) polyhedra, we  
87 followed the fitting approach of Cheah et al., 2000 and included a Cu-O-O MS path with CN  
88 and  $\sigma^2$  constrained to 8 and 0.007  $\text{\AA}^2$  respectively, which reflects MS from first-shell equatorial  
89 oxygen atoms (Cheah et al., 2000). We note here that the fitting routine cannot distinguish  
90 between backscattering from Cu-Si and Cu-Al atoms due to the similar atomic number of Si  
91 and Al. Therefore, we report fitting results involving Si and Al as Cu-Si/Al (Sushkevich et al.,  
92 2020). The goodness-of-fit was evaluated using the R-factor, which is the mean square

93 difference between the fit and the data on a point-by-point basis:  $R = \sum_i (\text{data}_i - \text{fit}_i)^2 / \sum_i$   
94  $(\text{data}_i)^2$ .

95

#### 96 S4. Synchrotron X-ray diffraction results for Cu(II)-loaded zeolites

97       After exposure to 3 mM Cu(II), patterns for both the synthetic faujasite and natural  
98 clinoptilolite displayed increased diffraction intensity at positions where atacamite  
99 ( $\text{Cu}_2(\text{OH})_3\text{Cl}$ ) peaks are expected (1.15, 2.22, 2.28, 2.77, 3.45 and 3.66 Å). These are  
100 sometimes visible as proper peaks or shoulders in the measured data (Figure S8), but are clear  
101 in the calculated patterns of the difference between reacted and unreacted solids (grey lines in  
102 Figure S8). For the calculated difference patterns, small peaks for atacamite are also discernible  
103 for the data obtained with 0.6 mM Cu at pH 6. For all samples plotted in Figure S8, the solutions  
104 are predicted to be supersaturated with respect to atacamite using PHREEQC, implying  
105 favorable thermodynamics for its formation. Thus, we conclude that atacamite formed in at  
106 least some of the experiments where aqueous Cu(II) concentration exceeded its solubility,  
107 which was particularly the case for the pH 6 samples containing the highest polymeric Cu(II)  
108 content derived by EXAFS analysis.

109

#### 110 S5. Results of faujasite adsorption modelling

111       For the faujasite sample series, a larger adsorption dataset is available that appears to  
112 consist of primarily monomeric Cu adsorption (Figure 5 in the main text), which allowed us to  
113 fit constants for a cation exchange model and test its applicability using the adsorption  
114 experiments at variable NaCl concentrations (Figure 3 in the main text). These results are  
115 shown in Figure S10 and the derived constants and CEC are shown in Table S4. In general, the  
116 calculated values agree reasonably well with those measured and the parameters fitted with the  
117 two methods are consistent. One key finding relevant here is that our models of the adsorption

118 data, which fit reasonably well, did not consider differences in monomeric Cu(II) binding that  
119 were revealed in the EXAFS analysis (*i.e.*, outer-sphere and inner-sphere). For the faujasite  
120 samples, the EXAFS analysis did not indicate a systematic relationship between the occurrence  
121 of either of the two monomeric Cu species with Cu(II) loading, pH or time. This lack of  
122 systematic trend suggests that the stability of the two types of monomeric Cu coordination  
123 environments might be quite similar, such that minute differences in experimental conditions  
124 or sample preparation might cause shifts in their relative abundance. Therefore, pooling the  
125 two species during modelling makes sense because it decreases the number of adjustable  
126 parameters and it does not introduce substantial error in the fitting.

127

128

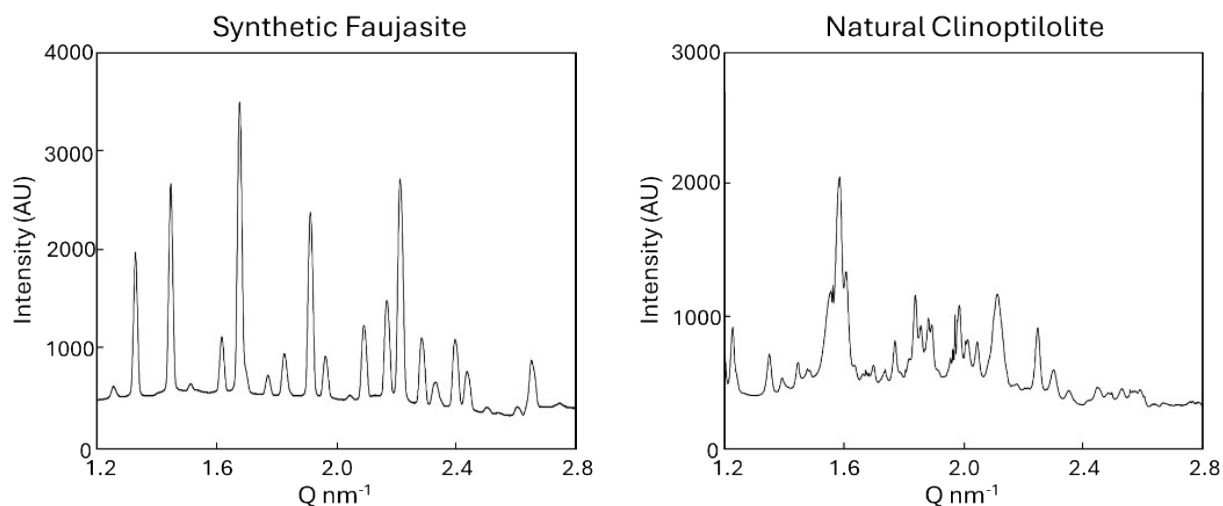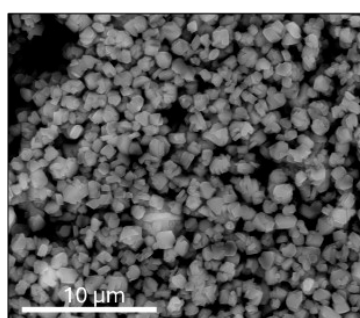

| Element | Mass Fraction (%)<br>EDS of 9 Points |
|---------|--------------------------------------|
| C       | 0 ± 0                                |
| Si      | 26.7 ± 1.1                           |
| Al      | 11.5 ± 0.4                           |
| Na      | 8.5 ± 0.6                            |
| O       | 49.8 ± 1.3                           |

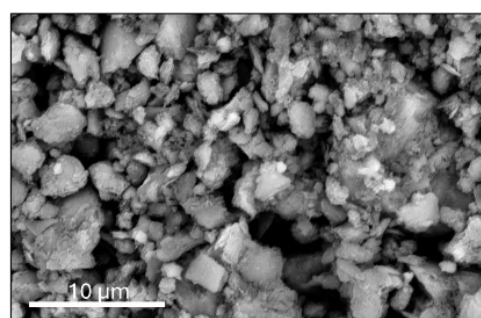

| Element | Mass Fraction (%)<br>EDS of 9 Points |
|---------|--------------------------------------|
| C       | 3.8 ± 0.8                            |
| Si      | 31.5 ± 1.8                           |
| Al      | 5.6 ± 1.1                            |
| Na      | 2.4 ± 0.7                            |
| O       | 53.3 ± 1.5                           |

129

130

131 Figure S1: Structural data for the initial zeolite samples. Data for synthetic faujasite and natural  
 132 clinoptilolite are presented on the left and right sides, respectively. Synchrotron X-ray  
 133 diffraction data is presented in the top panels, whereas SEM-EDS data are presented in the  
 134 middle and bottom panels. The elemental composition given in this figure represents an  
 135 average of nine points for which EDS data were obtained. Notably, the synthetic faujasite  
 136 sample has substantially less C, implying less impurities in the solids than the natural  
 137 clinoptilolite sample.

138

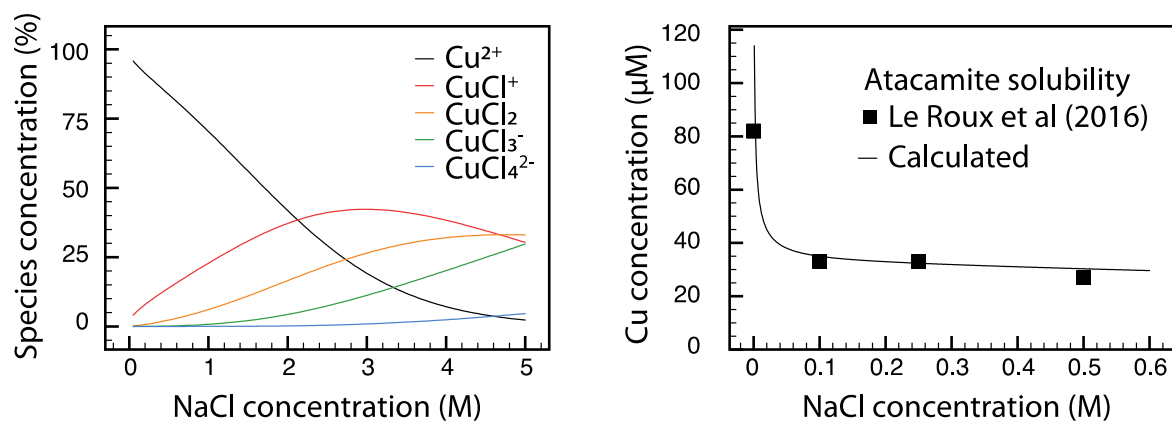

139

140 Figure S2. A) Calculated Cu(II) speciation with the Pitzer model used. B) Calculated and  
 141 measured solubility of atacamite.

142



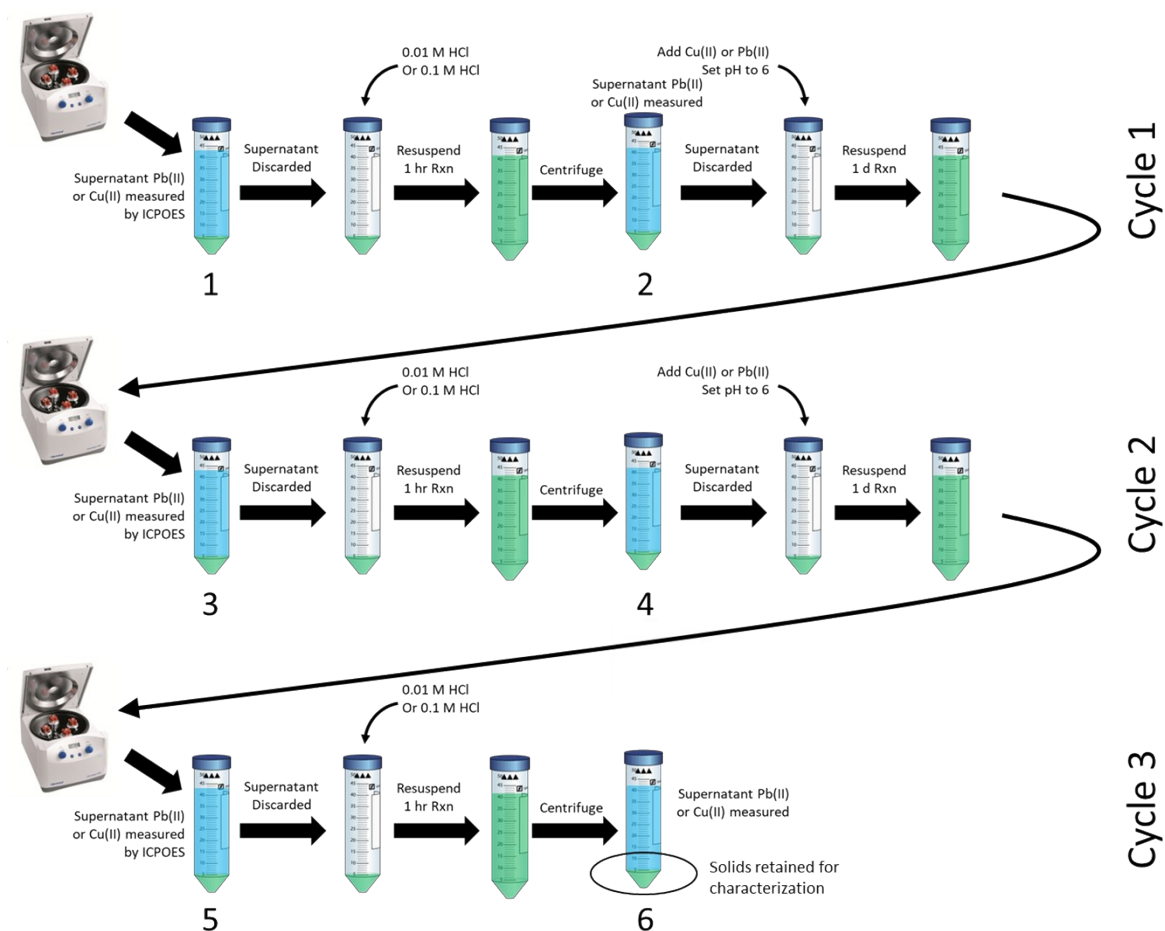

143

144 Figure S3: Schematic of the regeneration experimental protocol. In this schematic, numbers  
 145 1-6 represent the following: 1) Initial adsorption experiment, 2) Cu(II) loading after the first  
 146 acidic regeneration, 3) Cu(II) loading after the second adsorption experiment, 4) Cu(II) loading  
 147 after the second acidic regeneration, 5) Cu(II) loading after the final adsorption experiment, 6)  
 148 Cu(II) loading after the final acidic regeneration. The solids obtained after the final  
 149 regeneration experiment were retained for synchrotron-based analysis.

150

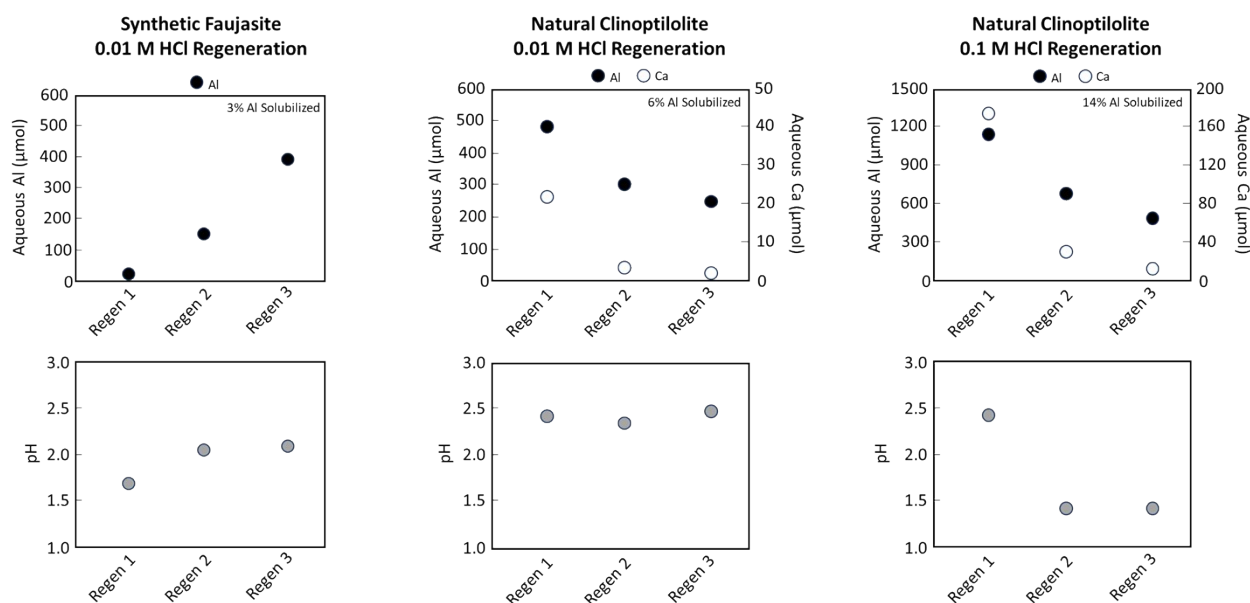

151

152 Figure S4: Solution composition following repeated cycles of acidic regeneration for synthetic  
 153 faujasite using 0.01 M HCl (left panels) and natural clinoptilolite using 0.01 M HCl (middle  
 154 panels) and 0.1 M HCl (right panels). The release of Al (black symbols) and Ca (white symbols)  
 155 are plotted on the top panels, whereas pH is given in the bottom panels. Note that Ca was not  
 156 released from the synthetic faujasite sample because Ca is not present in this solid. The initial  
 157 solids content for each sample was 5 g/L.

158

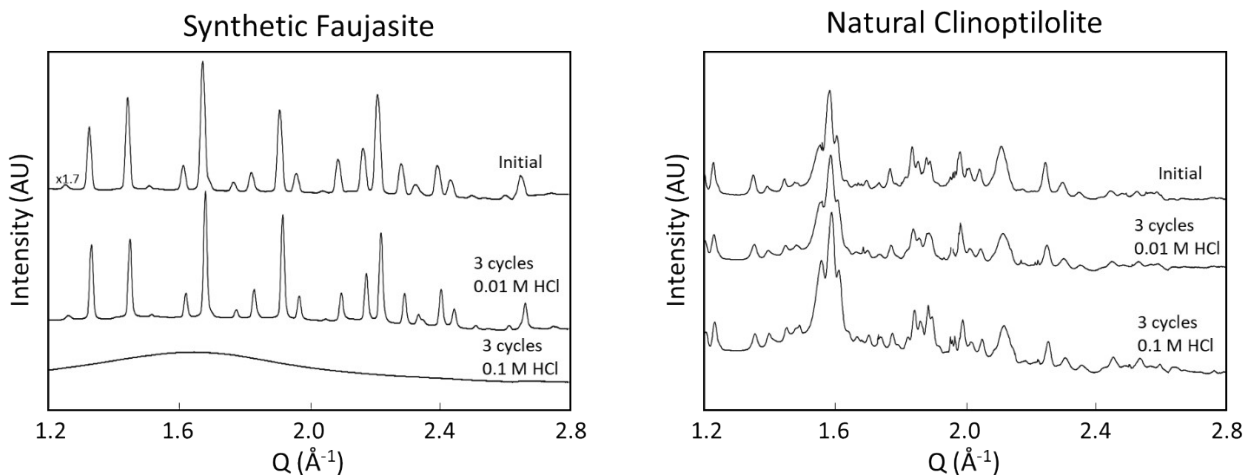

159

160 Figure S5: Synchrotron XRD of synthetic faujasite (left) and natural clinoptilolite (right)  
 161 following repeated cycles of acidic regeneration using 0.01 M and 0.1 M HCl. The solids  
 162 remaining after three cycles of 0.1 M HCl regeneration of the faujasite samples resembled a  
 163 gel and no Bragg diffraction peaks were observed in the XRD pattern, consistent with the  
 164 disintegration of the faujasite crystal in highly acidic conditions.

165

166

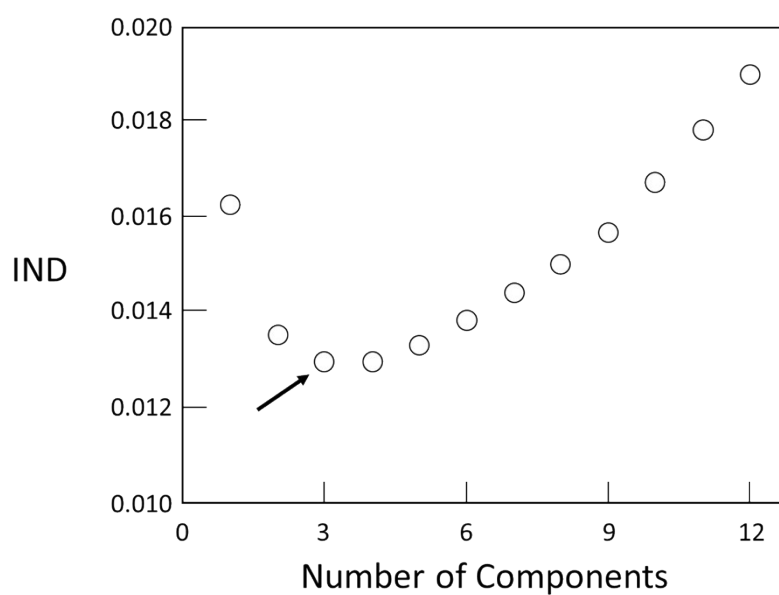

167

168 Figure S6: Results of the principal component analysis. IND is plotted as a function of the  
169 number of independent components. The arrow highlights the minimum of the IND function  
170 when three components are used.

171

172

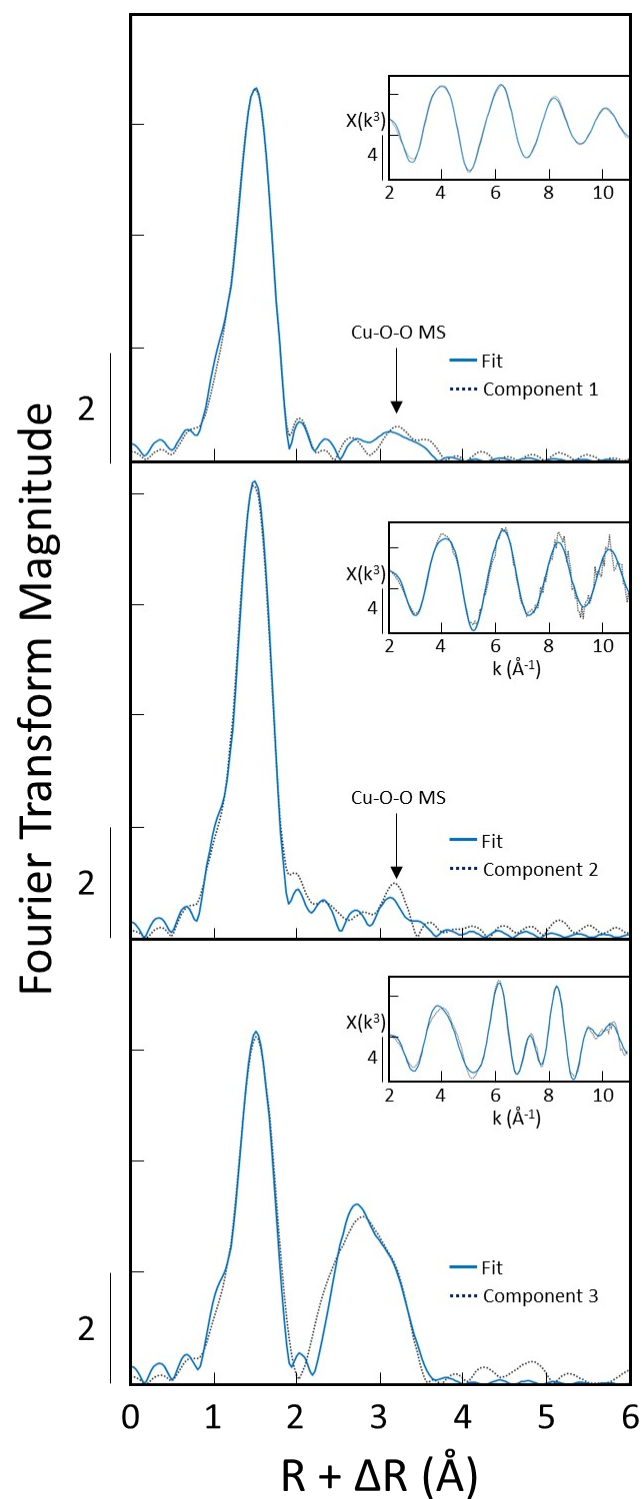

173

174 Figure S7: Output of the shell-by-shell fits (blue lines) overlain on ITFA-extracted principal  
 175 components; Component 1 (top panel), Component 2 (middle panel) and Component 3 (bottom  
 176 panel). The inset in each panel shows the corresponding EXAFS spectra. Components 1, 2 and  
 177 3 are interpreted as outer-sphere Cu complexes, inner-sphere Cu complexes and polymeric Cu,  
 178 respectively.

179

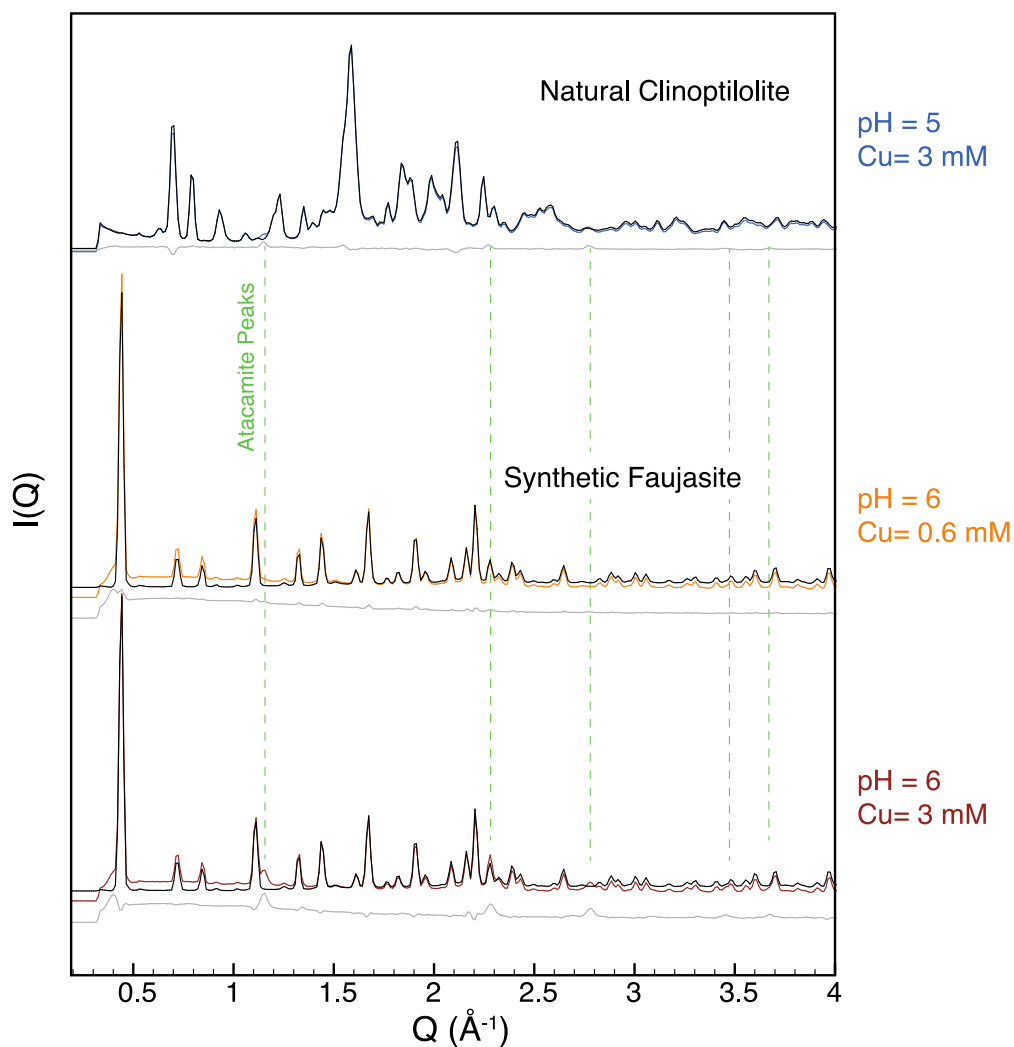

180

181 Figure S8: Synchrotron XRD data of natural clinoptilolite (top) without Cu exposure (black)  
 182 and after exposure to 3 mM Cu at pH 5 (blue), synthetic faujasite (middle) without Cu exposure  
 183 (black) and after exposure to 0.6 mM Cu at pH 6 (orange) and synthetic faujasite (bottom)  
 184 without Cu exposure (black) and after exposure to 3 mM Cu at pH 6 (brown). Peak positions  
 185 for atacamite are indicated by green dashed lines. Differences between reacted and unreacted  
 186 samples are given in grey.

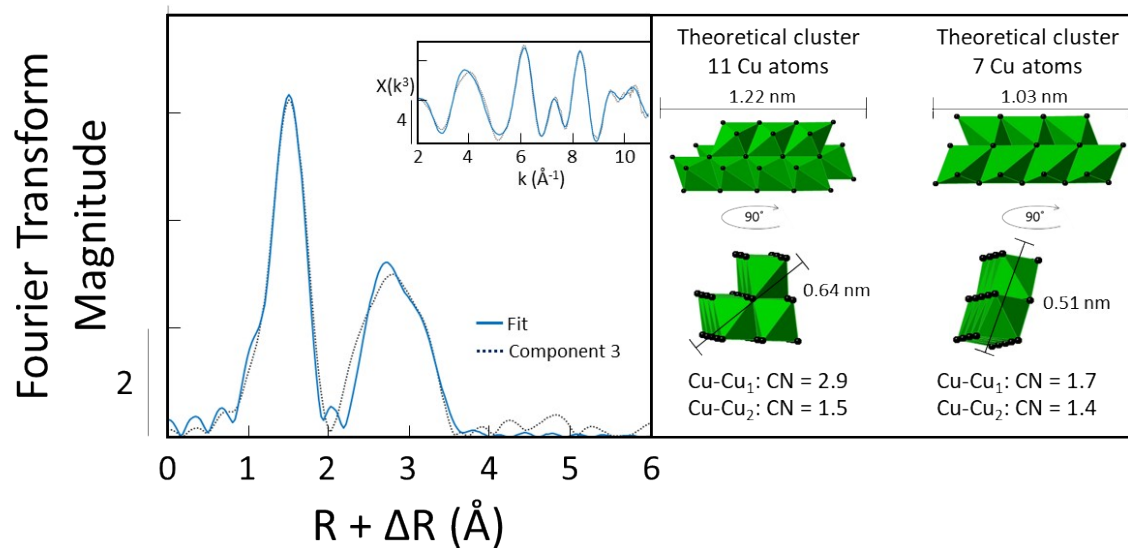

188

189 Figure S9: Models of polymeric Cu-Cu clusters derived from EXAFS shell-by-shell fits of  
 190 Component 3. The fit-derived coordination number (CN) for the Cu-Cu<sub>1</sub> and Cu-Cu<sub>2</sub> atomic  
 191 pairs was 1.9±0.3 and 1.4±0.3 (Table S3).

192

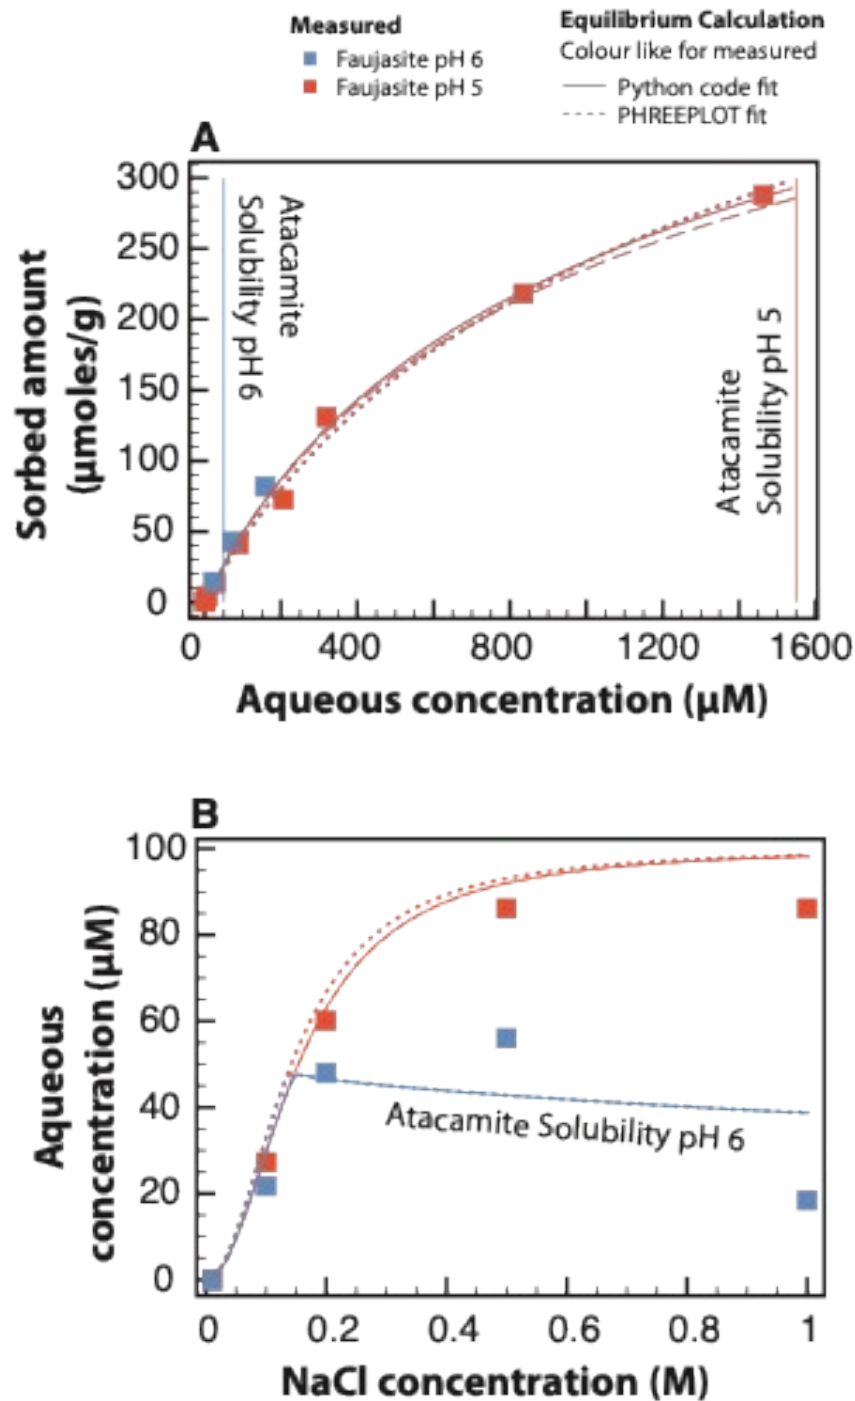

194

195 Figure S10: Adsorption isotherms at 25 °C for A) Cu(II) uptake by synthetic faujasite at pH 5  
 196 and 6, B) Measured and calculated Cu concentration resulting from uptake by synthetic  
 197 faujasite as a function of NaCl concentration. The decrease in the calculated aqueous  
 198 concentration at pH 6 and elevated NaCl concentration reflects atacamite precipitation. Initial  
 199 aqueous Cu(II) concentration was 0.1 mM.



Table S1. Reactions and equilibrium constants for speciation and solids use in the Cu system

| Reaction                                                                                                | log K  | Source       |
|---------------------------------------------------------------------------------------------------------|--------|--------------|
| $\text{Cu}^{2+} + \text{OH}^- = \text{CuOH}^+$                                                          | -7.96  | Haung (1989) |
| $\text{Cu}^{2+} + 2\text{OH}^- = \text{Cu}(\text{OH})_2$                                                | -16.23 | Haung (1989) |
| $\text{Cu}^{2+} + \text{Cl}^- = \text{CuCl}^+$                                                          | 0.11   | Haung (1989) |
| $\text{Cu}^{2+} + 2\text{Cl}^- = \text{CuCl}_2$                                                         | 0      | Haung (1989) |
| $\text{Cu}^{2+} + 3\text{Cl}^- = \text{CuCl}_3^-$                                                       | -1     | Haung (1989) |
| $\text{Cu}^{2+} + 4\text{Cl}^- = \text{CuCl}_4^{2-}$                                                    | -3.7   | Adjusted     |
| Atacamite solubility                                                                                    |        |              |
| $\text{Cu}_2(\text{OH})_3\text{Cl} + 3\text{H}^+ = 2\text{Cu}^{2+} + 3\text{H}_2\text{O} + \text{Cl}^-$ | 7.34   | MINTEQ       |

200

Table S2. Pitzer parameters used in the simulations.

| Parameter | Species 1            | Species 2            | Species 3            | Value     |
|-----------|----------------------|----------------------|----------------------|-----------|
| $b^0$     | $\text{Cu}^{2+}$     | $\text{Cl}^-$        |                      | 0.448214  |
|           | $\text{CuCl}_3^-$    | $\text{Cu}^{2+}$     |                      | 0.005214  |
|           | $\text{CuCl}_4^{2-}$ | $\text{Cu}^{2+}$     |                      | 0.793398  |
|           | $\text{CuCl}^+$      | $\text{Cl}^-$        |                      | 0.08247   |
|           | $\text{CuCl}_3^-$    | $\text{CuCl}^+$      |                      | 0.601236  |
|           | $\text{CuCl}_4^{2-}$ | $\text{CuCl}^+$      |                      | 0.297845  |
|           | $\text{CuCl}_3^-$    | $\text{Na}^+$        |                      | 0.151208  |
|           | $\text{CuCl}_4^{2-}$ | $\text{Na}^+$        |                      | -0.006297 |
| $b^1$     | $\text{Cu}^{2+}$     | $\text{Cl}^-$        |                      | 1.31604   |
|           | $\text{CuCl}_3^-$    | $\text{Cu}^{2+}$     |                      | -0.352932 |
|           | $\text{CuCl}_4^{2-}$ | $\text{Cu}^{2+}$     |                      | 1.520066  |
|           | $\text{Cl}^-$        | $\text{CuCl}^+$      |                      | 0.147128  |
|           | $\text{CuCl}_3^-$    | $\text{CuCl}^+$      |                      | 0.147128  |
|           | $\text{CuCl}_4^{2-}$ | $\text{CuCl}^+$      |                      | 0.43696   |
|           | $\text{CuCl}_3^-$    | $\text{Na}^+$        |                      | 0.040213  |
|           | $\text{CuCl}_4^{2-}$ | $\text{Na}^+$        |                      | 0.0505922 |
| $b^2$     | $\text{CuCl}_4^{2-}$ | $\text{Cu}^{2+}$     |                      | 2.528826  |
| $C^f$     | $\text{Cu}^{2+}$     | $\text{Cl}^-$        |                      | 0.001663  |
|           | $\text{CuCl}_3^-$    | $\text{Cu}^{2+}$     |                      | 0.351581  |
|           | $\text{CuCl}_4^{2-}$ | $\text{Cu}^{2+}$     |                      | 0.293231  |
|           | $\text{CuCl}_3^-$    | $\text{CuCl}^+$      |                      | 0.700384  |
|           | $\text{CuCl}_4^{2-}$ | $\text{CuCl}^+$      |                      | 0.340713  |
|           | $\text{CuCl}_3^-$    | $\text{Na}^+$        |                      | -0.012021 |
|           | $\text{CuCl}_4^{2-}$ | $\text{Na}^+$        |                      | 0.004219  |
|           | $\text{CuCl}^+$      | $\text{Cu}^{2+}$     |                      | -0.016065 |
| $\theta$  | $\text{CuCl}_3^-$    | $\text{Cl}^-$        |                      | 0.078296  |
|           | $\text{CuCl}_4^{2-}$ | $\text{Cl}^-$        |                      | 0.25659   |
|           | $\text{CuCl}_3^-$    | $\text{CuCl}_4^{2-}$ |                      | 0.326518  |
|           | $\text{Cu}^{2+}$     | $\text{Na}^+$        |                      | 0.01966   |
|           | $\text{CuCl}^+$      | $\text{Na}^+$        |                      | -0.013918 |
|           | $\text{CuCl}_2$      | $\text{CuCl}^+$      |                      | 0.416289  |
|           | $\text{CuCl}_2$      | $\text{Cu}^{2+}$     |                      | 0.469588  |
|           | $\text{CuCl}_2$      | $\text{CuCl}_3^-$    |                      | 1.521582  |
| $l$       | $\text{CuCl}_2$      | $\text{CuCl}_4^{2-}$ |                      | 0.273556  |
|           | $\text{CuCl}_2$      | $\text{Cl}^-$        |                      | 0.080942  |
|           | $\text{CuCl}_2$      | $\text{Na}^+$        |                      | 0.041578  |
|           | $\text{Cu}^{2+}$     | $\text{CuCl}^+$      | $\text{Cl}^-$        | 0.045495  |
|           | $\text{Cu}^{2+}$     | $\text{CuCl}^+$      | $\text{CuCl}_3^-$    | -0.002276 |
|           | $\text{Cu}^{2+}$     | $\text{CuCl}^+$      | $\text{CuCl}_4^{2-}$ | 0.171585  |
|           | $\text{Cu}^{2+}$     | $\text{Cl}^-$        | $\text{CuCl}_3^-$    | 0.52963   |
|           | $\text{Cu}^{2+}$     | $\text{Cl}^-$        | $\text{CuCl}_4^{2-}$ | 0.230288  |
| $y$       | $\text{Cu}^{2+}$     | $\text{CuCl}_3^-$    | $\text{CuCl}_4^{2-}$ | -4.991511 |
|           | $\text{CuCl}^+$      | $\text{Cl}^-$        | $\text{CuCl}_3^-$    | 0.656652  |
|           | $\text{CuCl}^+$      | $\text{Cl}^-$        | $\text{CuCl}_4^{2-}$ | 0.151079  |
|           | $\text{CuCl}^+$      | $\text{CuCl}_3^-$    | $\text{CuCl}_4^{2-}$ | -3.988599 |
|           | $\text{Cu}^{2+}$     | $\text{Na}^+$        | $\text{Cl}^-$        | 0.02153   |
|           | $\text{CuCl}^+$      | $\text{Na}^+$        | $\text{Cl}^-$        | -0.009949 |
|           | $\text{Cu}^{2+}$     | $\text{Na}^+$        | $\text{CuCl}_3^-$    | -0.34397  |
|           | $\text{CuCl}^+$      | $\text{Na}^+$        | $\text{CuCl}_3^-$    | 3.20739   |
|           | $\text{Cu}^{2+}$     | $\text{Na}^+$        | $\text{CuCl}_4^{2-}$ | 0.001007  |
|           | $\text{CuCl}^+$      | $\text{Na}^+$        | $\text{CuCl}_4^{2-}$ | -0.020676 |
|           | $\text{Cl}^-$        | $\text{CuCl}_3^-$    | $\text{Na}^+$        | 0.008721  |
|           | $\text{CuCl}_3^-$    | $\text{CuCl}_4^{2-}$ | $\text{Na}^+$        | -0.002515 |

203 Parameter values were adopted from Haung (1989) except for the  $\text{CuCl}^+ - \text{Cl}^-$  interaction,  
 204 which was omitted after tests

Table S3: Cu K-edge shell-by-shell fitting results

| Sample Name            | Atomic Pairs | CN        | R (Å)       | $\sigma^2$ (Å <sup>2</sup> ) | $\Delta E_0$ (eV) | R-Factor |
|------------------------|--------------|-----------|-------------|------------------------------|-------------------|----------|
| <b>CuO<sup>A</sup></b> | Cu-O         | 3.2 (0.4) | 1.96 (0.01) | 0.002 (0.001)                | 1.0 (1.5)         | 0.009    |
|                        | Cu-Cu1       | 5.8 (0.9) | 2.92 (0.01) | 0.007                        |                   |          |
|                        | Cu-Cu2       | 5.3 (1.1) | 3.13 (0.01) | 0.006                        |                   |          |
|                        | Cu-Cu3       | 4.2 (0.9) | 3.43 (0.01) | 0.006                        |                   |          |
|                        | Cu-O-O       | 8         | 3.94 (0.08) | 0.007                        |                   |          |
| <b>Aqueous Cu(II)</b>  | Cu-O         | 4.3 (0.2) | 1.97 (0.01) | 0.007 (0.001)                | -3.2 (0.6)        | 0.007    |
|                        | Cu-O-O       | 8         | 4.04 (0.03) | 0.007                        |                   |          |
| <b>Comp. 1</b>         | Cu-O         | 4.3 (0.2) | 1.97 (0.01) | 0.007 (0.001)                | -3.2 (0.6)        | 0.007    |
|                        | Cu-O-O       | 8         | 4.04 (0.03) | 0.007                        |                   |          |
| <b>Comp. 2</b>         | Cu-O         | 3.8 (0.3) | 1.94 (0.01) | 0.004 (0.001)                | -1.7 (1.2)        | 0.018    |
|                        | Cu-Si/Al     | 0.8 (0.5) | 2.82 (0.05) | 0.012                        |                   |          |
|                        | Cu-O-O       | 8         | 3.96 (0.05) | 0.007                        |                   |          |
| <b>Comp. 3</b>         | Cu-O         | 3.5 (0.4) | 1.97 (0.01) | 0.006 (0.001)                | -2.4 (1.3)        | 0.015    |
|                        | Cu-Cu1       | 1.9 (0.3) | 3.04 (0.01) | 0.007                        |                   |          |
|                        | Cu-Cu2       | 1.4 (0.3) | 3.45 (0.01) | 0.006                        |                   |          |
|                        | Cu-O-O       | 8         | 3.99 (0.05) | 0.007                        |                   |          |

<sup>A</sup>The fits of CuO were modelled after those described in (Cheah et al., 2000) The constrained  $\sigma^2$  values in the CuO fits and the CN of the Cu-O-O MS path were taken from Cheah et al. 2000. For all fits, fitting parameters that were allowed to float are accompanied by fit determined standard errors in parenthesis, whereas constrained parameters are written without parentheses. The number of independent points was 17.0 for all fits, whereas the number of variables ranged from was 5 to 11. The first were performed from 1-4 Å and  $S_0^2$  was constrained to 0.9.

214      Table S4. Fitted values for exchange reaction constant (logarithmic) and CEC.

| <b>Zeolite</b>      | <b>Method</b> | <b>System</b> | <b>Log <math>K_{Cu}</math></b> | <b>Log <math>K_{Pb}</math></b> | <b>CEC (mmoles/g)</b> |
|---------------------|---------------|---------------|--------------------------------|--------------------------------|-----------------------|
| Synthetic faujasite | PHREEPLOT     | Cu            | 0.878                          |                                | 1.38                  |
|                     | Python App    | Cu            | 0.856                          |                                | 1.44                  |

215

216

217

## 218 References

- 219 Allison, J.D., Brown, D.S., Novo-Gradac, K.J., 1990. MINTEQA2/PRODEFA2—A  
220 Geochemical Assessment Model for Environmental Systems: Version 3.0 User's  
221 Manual. U.S. Environmental Protection Agency, Athens, Georgia.
- 222 Belokoneva, E.L., Gubina, Y.K., Forsyth, J.B., Brown, P.J., 2002. The charge-density  
223 distribution, its multipole refinement and the antiferromagnetic structure of diopside,  
224  $\text{Cu}_6[\text{Si}_6\text{O}_{18}]\cdot 6\text{H}_2\text{O}$ . *Phys. Chem. Miner.* 29, 430–438. [https://doi.org/10.1007/s00269-](https://doi.org/10.1007/s00269-002-0246-6)  
225 002-0246-6
- 226 Cheah, S.F., Brown, G.E., Parks, G.A., 2000. XAFS study of Cu model compounds and  
227  $\text{Cu}^{2+}$  sorption products on amorphous  $\text{SiO}_2$ ,  $\gamma\text{-Al}_2\text{O}_3$ , and anatase. *Am. Mineral.* 85,  
228 118–132. <https://doi.org/10.2138/am-2000-0113>
- 229 Downes, C.J., Pitzer K.S., 1976. Thermodynamics of electrolytes. Binary mixtures formed  
230 from aqueous  $\text{NaCl}$ ,  $\text{Na}_2\text{SO}_4$ ,  $\text{CuCl}_2$ , and  $\text{CuSO}_4$  at  $25^\circ\text{C}$ . *J. Solut. Chem.* 5, 389-398.
- 231 Haung, H.-H. (1989) Estimation of Pitzer's ion interaction parameters for electrolytes  
232 involved in complex formation using a chemical equilibrium model. *J. Solut. Chem.* 18,  
233 1069-1084.
- 234 Kim, H.-T., Frederick Jr., W.J., 1988. Evaluation of Pitzer Ion Interaction Parameters of  
235 Aqueous Electrolytes at  $25^\circ\text{C}$ : 1. Single Salt Parameters. *J. Chem. Eng. Data* 33, 177-  
236 184.
- 237 Ma, X.-C., Li, X.-P., He, X.-F., Sang, S.-H., Lei, N.-F., Nie, Z., 2019. Thermodynamic Study  
238 of the  $\text{NaCl}\text{--}\text{CuCl}_2\text{--}\text{H}_2\text{O}$  Ternary System at 298.15 K by the Electromotive Force  
239 Method. *J. Chem. Eng. Data* 64, 90–97.
- 240 Le Roux, S. G., Miller, J. A., Dunford, A. J. and Clarke, C. E. (2016) The dissolution kinetics  
241 of atacamite in the acid range and the stability of atacamite. *Appl. Geochem.* 64, 22-29.
- 242 Moog, H. C. and Cannepin, R. (2014) Entwicklung von thermodynamischen Daten für die  
243 Belange der thermodynamischen Gleichgewichtsmodellierung von Prozessen in tiefen,  
244 geothermalen Schichten. In: Teilprojekt A (GRS): Bestimmung von  
245 Ionenwechselwirkungskoeffizienten und Aufstellung eines Reservoirmodells. 165 pp.  
246 Available at <https://www.grs.de/sites/default/files/pdf/grs-337.pdf>
- 247 Newville, M., 2001. IFEFFIT: interactive XAFS analysis and FEFF fitting. *J. Synchrotron*  
248 *Radiat.* 322–324. [https://doi.org/https://doi.org/10.1107/S0909049500016964](https://doi.org/10.1107/S0909049500016964)
- 249 Oswald, H.R., Reller, A., Schmalle, H.W., Dubler, E., 1990. Structure of copper(II)  
250 hydroxide,  $\text{Cu}(\text{OH})_2$ . *Acta Crystallogr. Sect. C Cryst. Struct. Commun.* 46, 2279–2284.  
251 <https://doi.org/10.1107/s0108270190006230>
- 252 Rehr, J.J., Albers, R.C., Zabinsky, S.I., 1992. High-order multiple-scattering calculations of  
253 X-ray absorption fine structure. *Phys. Rev. Lett.* 3397–3400.
- 254 Sushkevich, V.L., Safonova, O. V., Palagin, D., Newton, M.A., van Bokhoven, J.A., 2020.  
255 Structure of copper sites in zeolites examined by Fourier and wavelet transform analysis  
256 of EXAFS. *Chem. Sci.* 11, 5299–5312. <https://doi.org/10.1039/d0sc01472a>
- 257 Vital, M., Pedersen, T.v.B., Molander, J., Jakobsen, R., Tobler, D.J., Dideriksen, K., 2025.  
258 Dissolution kinetics for the  $\text{Fe}(\text{II})\text{--}\text{Fe}(\text{III})$  layered double hydroxide, green rust. *Appl. Clay*

259 Sci. 272, 107814. Fitting routine available at ; available at  
260 <https://geusgitlab.geus.dk/geochemical-modelling/fitting-phreeqc>  
261
